# Supplementary material for: Development of carrier-free self-assembled nanoparticles based on fenhexamid and polyhexamethylene biguanide for sustainable plant disease management
Source: Royal Society of Chemistry journal article supplement (doi:10.1039/d1gc00006c), 2021-01-01
Supplement: d1gc00006c1.pdf [file d1gc00006c1.pdf]

## ***Supporting Information***

### **Development of carrier-free self-assembled nanoparticles based on fenhexamid and polyhexamethylene biguanide for sustainable plant disease management**

Gang Tang, Yuyang Tian, Junfan Niu, Jingyue Tang, Jiale Yang, Yunhao Gao, Xi Chen, Xuan Li, Huachen Wang, Yongsong Cao\*

College of Plant Protection, China Agricultural University, Beijing, China

\*Corresponding author: NO.2 Yuanmingyuan West Road, China Agricultural University, Beijing, China, 100193

Telephone: 86-10-62734302. Fax: 86-10-62734302.

Email: caoysong@126.com, [caoys@cau.edu.cn](mailto:caoys@cau.edu.cn)

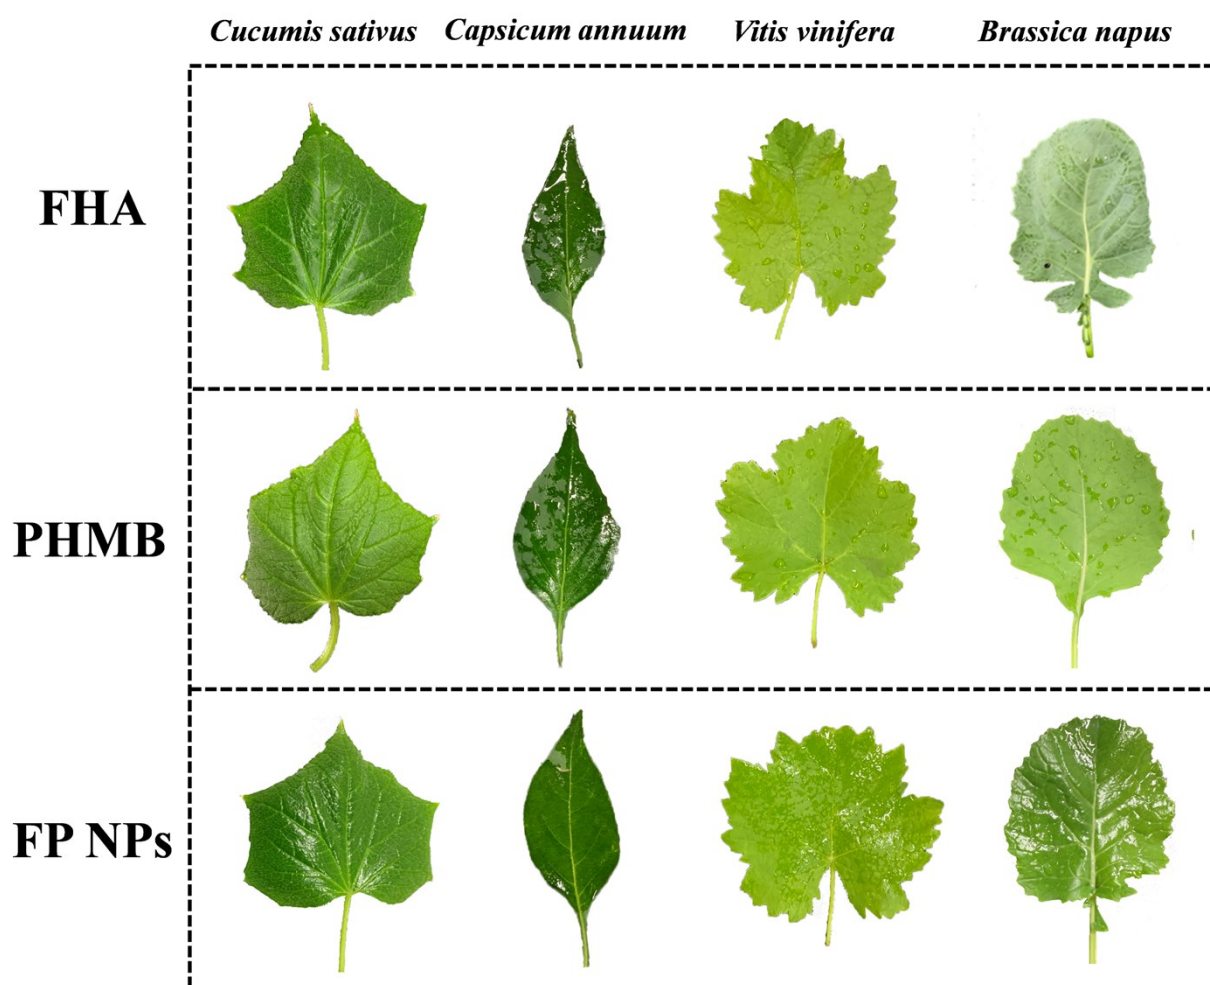

Figure S1. Pictures of max retentions of FHAS, PHMB, and FP NPs on different plant leaves.

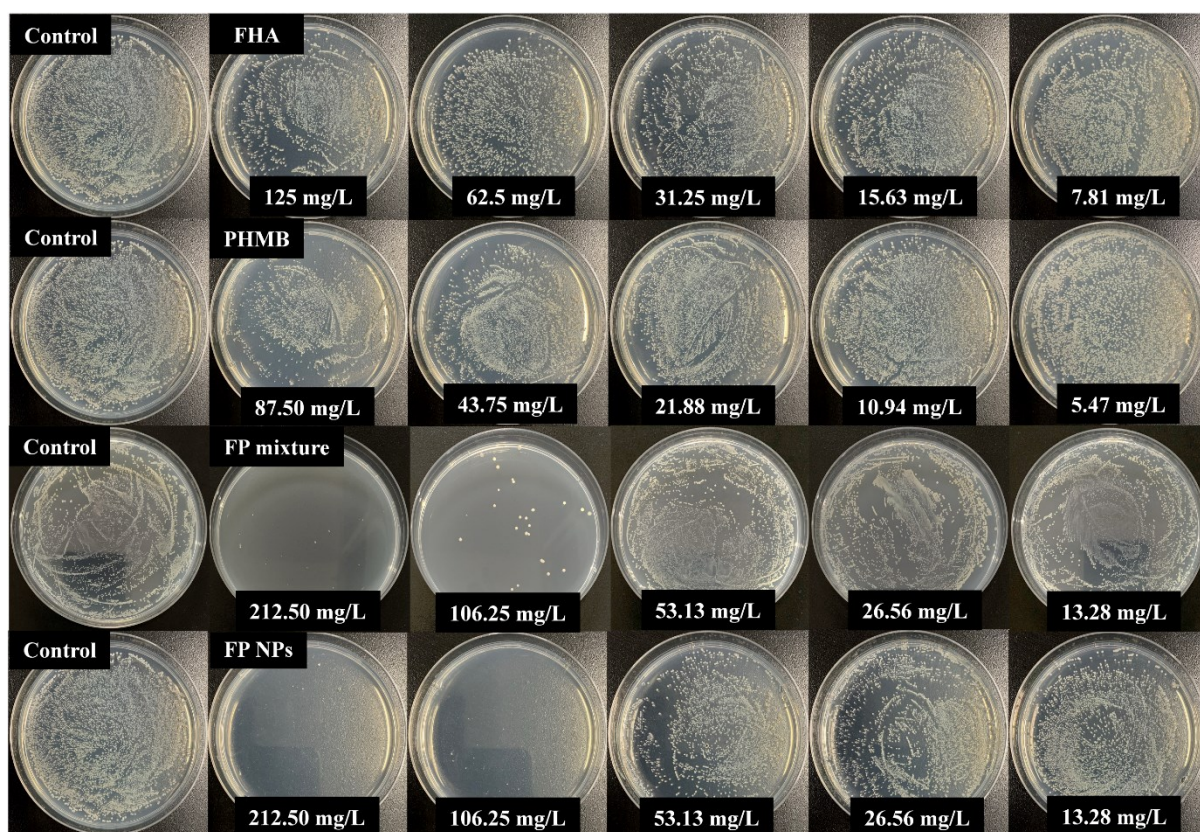

Figure S2. Pictures of inhibition rates of FHA, PHMB, FP mixture, and FP NPs against *Pseudomonas syringae* pv. *lachrymans* at different concentrations.

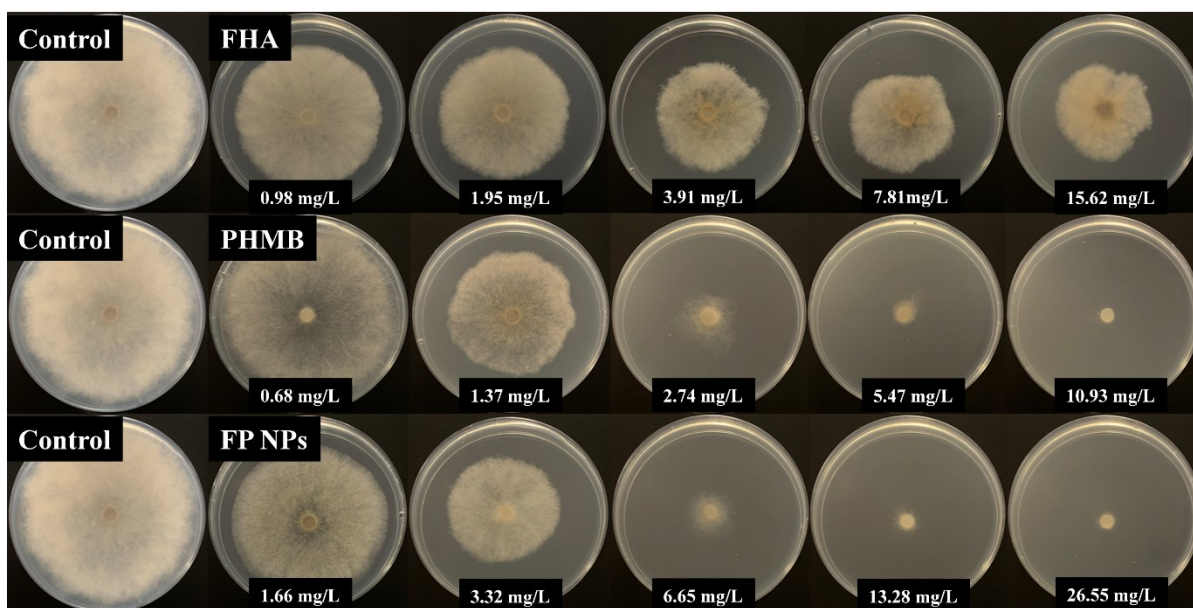

Figure S3. Pictures of antimicrobial activities of FHA, PHMB, and FP NPs against *Botrytis cinerea*.



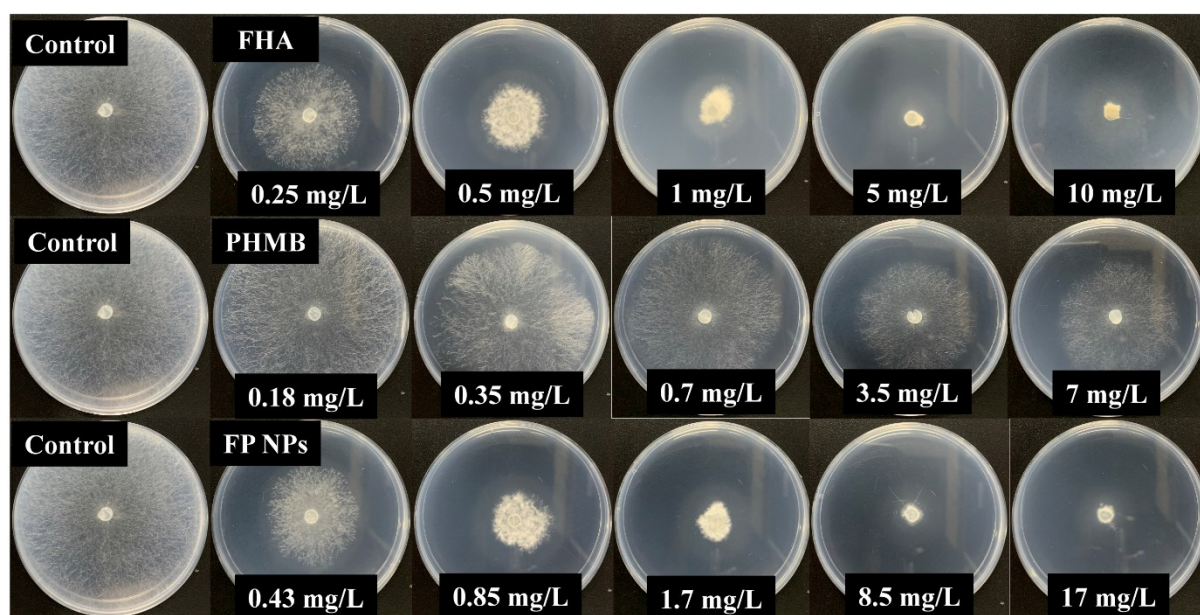

Figure S4. Pictures of antimicrobial activities of FHA, PHMB, and FP NPs against *Sclerotinia sclerotiorum*.
